# Supplementary material
Source: MDPI journal article supplement (https://www.mdpi.com/1424-2818/14/6/416)
Supplement: s1 [file s1]

**Table S1.** Provenance and meat type of Bulgarian traditional dry cured meat products

| Type     | Denomination                               | Provinces         | Meat/<br>Offal<br>type       | Reference  |
|----------|--------------------------------------------|-------------------|------------------------------|------------|
| Ham      | <i>Elenski but*</i>                        | Veliko<br>Tarnovo | pork                         | Field data |
| Sausage  | <i>Etarska kaltsanitsa</i>                 | Gabrovo           | pork                         | Field data |
| Pastarma | <i>Ovcha pastarma</i>                      | Blagoevgrad       | lamb                         | Field data |
| Sausage  | <i>Babichka</i>                            | Varna             | pork                         | Field data |
| Sausage  | <i>Filevska puska*</i>                     | Haskovo           | pork                         | Field data |
| Pastarma | <i>Gabrovsko file</i>                      | Gabrovo           | pork                         | Field data |
| Sausage  | <i>Gabrovska lukanka</i>                   | Gabrovo           | pork                         | Field data |
| Sausage  | <i>Kalbasa</i>                             | Vratsa            | pork                         | Field data |
| Sausage  | <i>Konski sudzhuk</i>                      | Gabrovo           | horse                        | Field data |
| Sausage  | <i>Meurche</i>                             | Blagoevgrad       | pork                         | Field data |
| Sausage  | <i>Babichka</i>                            | Blagoevgrad       | pork                         | Field data |
| Sausage  | <i>Dedets</i>                              | Blagoevgrad       | pork                         | Field data |
| Sausage  | <i>Sarnachka puska</i>                     | Haskovo           | pork                         | Field data |
| Sausage  | <i>Selska lukanka</i>                      | Haskovo           | pork                         | Field data |
| Sausage  | <i>Starodzhelezarki starets</i>            | Plovdiv           | pork                         | Field data |
| Sausage  | <i>Strandzhenska baba</i>                  | Burgas            | pork                         | Field data |
| Sausage  | <i>Strandzhensko<br/>dyado/parduhalche</i> | Burgas            | pork                         | Field data |
| Sausage  | <i>Tsalapishki babek</i>                   | Plovdiv           | pork                         | Field data |
| Sausage  | <i>Yabylkovska puska</i>                   | Haskovo           | pork                         | Field data |
| Sausage  | <i>Tranenik</i>                            | Blagoevgrad       | pork<br>liver                | Field data |
| Sausage  | <i>Nozagorska lukanka</i>                  | Sliven            | pork                         | Field data |
| Sausage  | <i>Banska lukanka</i>                      | Pazardzhik        | pork+be<br>ef/veal/<br>horse | Field data |
| Sausage  | <i>Banska karvavitsa</i>                   | Pazardzhik        | pork+of<br>fal               | Field data |
| Other    | <i>Ovchi nogi</i>                          | Blagoevgrad       | mutton<br>shanks             | Field data |
| Sausage  | <i>Lukanka smyadovska*</i>                 | Shumen            | pork +<br>beef/<br>buffalo   | [35]       |
| Pastarma | <i>Kemik pastarma/Kakach</i>               | Smolyan           | mutton/<br>goat              | [37]       |

|          |                                        |                |                         |      |
|----------|----------------------------------------|----------------|-------------------------|------|
| Sausage  | <i>Karlovska nadenitsa</i>             | Plovdiv        | pork                    | [37] |
| Sausage  | <i>Karlovski babek</i>                 | Plovdiv        | pork                    | [37] |
| Sausage  | <i>Malokonarski babek</i>              | Pazardzhik     | pork                    | [37] |
| Sausage  | <i>Plovdivski starets</i>              | Plovdiv        | pork                    | [37] |
| Sausage  | <i>Banski starets*</i>                 | Blagoevgrad    | pork                    | [37] |
| Sausage  | <i>Koprivshenska lukanka</i>           | Sofia          | pork+beef               | [37] |
| Sausage  | <i>Velikotarnovska pushena lukanka</i> | Veliko Tarnovo | pork+beef               | [37] |
| Sausage  | <i>Pirdopska lukanka</i>               | Sofia          | veal+pork               | [37] |
| Pastarma | <i>Kayserovan vrat Trakiya**</i>       | Plovdiv        | pork                    | [48] |
| Pastarma | <i>Role Trapezitsa**</i>               | Veliko Tarnovo | pork collar rolled cuts | [48] |
| Pastarma | <i>File Elena**</i>                    | Veliko Tarnovo | pork tenderloin cuts    | [48] |
| Pastarma | <i>Pastarma Govezhda**</i>             | Gabrovo        | beef                    | [48] |
| Sausage  | <i>Gornooryahovski sudzhuk**</i>       | Veliko Tarnovo | beef                    | [48] |
| Sausage  | <i>Lukanka Panagyurska**</i>           | Pazardzhik     | pork + beef/buffalo     | [48] |

\*Bulgarian artisanal meat product industrially manufactured in the past; \*\* Industrialized version of Bulgarian traditional dry meat products registered as Traditional Speciality Guaranteed (TSG) or Protected Geographical Indication (PGI).
